# Supplementary material for: New possible candidate structure for phase IV of solid hydrogen
Source: Royal Society of Chemistry journal article supplement (doi:10.1039/d0ra03295f), 2020-01-01
Supplement: d0ra03295f1.pdf [file d0ra03295f1.pdf]

Cite this: DOI: 00.0000/xxxxxxxxxx

# New possible candidate structure for phase IV of solid hydrogen<sup>†</sup>

Guo-Jun Li,<sup>a,b</sup> Yun-Jun Gu,<sup>b</sup> Zhi-Guo Li,<sup>b</sup> Qi-Feng Chen,<sup>\*b</sup> and Xiang-Rong Chen<sup>‡a</sup>

## 1 Supporting Information

### 1.1 Vibrational analysis of Ama2 structure

Since the Ama2 structure has 24 atoms in primitive cell, there are 69 optical modes with the irreducible representation  $\Gamma = 20A1 \oplus 22B1 \oplus 16B2 \oplus 14A2$ . All the optical modes are the Raman-active modes, whereas *A1*, *B1*, and *B2* are the IR active modes. Here we focused on *A1* modes with 3182/3939  $\text{cm}^{-1}$  and *B1* modes with 3765/4292  $\text{cm}^{-1}$  corresponding to the experimental Raman and IR vibron frequencies, respectively. The rest of high frequencies modes with the Raman have a weak intensity and only influence peaks broadening or barely observable peaks in spectra. As illustrated in Figure S1, the lower and higher frequencies of Raman or IR vibrons correspond to hydrogen molecular vibrations of weakly bonded molecular layers and of strongly bonded molecular layers respectively.

### 1.2 Molecular projection method from first-principles molecular dynamics (FPMD) simulation

Here, we briefly introduce the calculated method about the Ama2 structure, while the detailed discussion about the molecular projection method can be found in papers.<sup>1-3</sup> All calculations were performed within the CASTEP code. Firstly, the Ama2 unit-cell was relaxed at 0 K and fixed pressure points. Then the Ama2 super-cell of  $1 \times 2 \times 3$  with 288 atoms was built as an initial structure for first-principles molecular dynamics (FPMD) simulations. The PBE functional and ultrasoft pseudopotential with 1200 eV cutoff, the k-point mesh of  $2 \times 1 \times 1$ , and time step with 0.5 fs were used in the FPMD calculations. We adopted the isothermal-isobaric ensemble (NPT) to equilibrate the structure to the desired pressure and temperature condition in 500 steps. Then a longer 2000 steps microcanonical ensemble (NVE) simulation was applied to the equilibrated structure. The velocity of each atom during the NVE simulation was projected in

the molecule onto the molecular stretching mode, and the Raman spectrum can be extracted by Fast Fourier Transform (FFT):

$$I(\omega) = FFT\left\{\sum_j v_j(t) \cdot [r_j(t) - r_{j_m}(t)]\right\} \quad (1)$$

where  $r_j(t)$ ,  $r_{j_m}(t)$ , and  $v_j(t)$  are the position of atom *j*, the position of the other in molecule, and the velocity of atom *j* at time *t*, respectively.

### 1.3 Bond length

Vibronic frequencies of Raman and IR of solid hydrogen are strongly correlated with the H-H molecular bond length (BL). We used the vdW-DF2 and PBE functionals to calculate the BL of Ama2 and Pc, as illustrated in Figure S3. The relationship between bond length and pressure predicted by vdW-DF2 and PBE give a similar trend. The BL1 and BL2 of Pc and Ama2 phase predicted by the vdW-DF2 shorten with the pressure increasing, whereas BL3 and BL4 lengthen. But for the PBE functional, it tends to estimate a longer bond length than the vdW-DF2 functional at the same pressure. These results are consistent with the conclusion of exchange-correlation functionals benchmarked by QMC,<sup>4</sup> which shows that PBE overestimate significantly the BL of candidate structure, while vdW-DF2 underestimates the BL with a comparable magnitude. The detailed difference of structure between Ama2 and Pc can also be represented by the bond length in Figure S3. For example, Figure S3 (a) and (b) both show that BL3 and BL4 of the weakly bonded molecular layer of Pc are close to being equal gradually, whereas the difference between BL3 and BL4 of weakly bonded molecular layer of Ama2 keeps little change with the increasing of pressure. This shows that Ama2 remains the distorted hexagonal pattern formed by H<sub>2</sub> of the weakly bonded molecular layer whereas the graphene-like layer of Pc gradually evolves into the graphene sheet.

### 1.4 Raman and IR spectra of Ama2

Figure S4 shows Raman and IR spectra of Ama2 calculated by PBE functional. Previous researches have pointed out that the low-frequency IR section doesn't exhibit significant absorption in experiment<sup>5</sup>, therefore, there is no plenty of IR data for frequency be-

<sup>a</sup> College of Physics, Sichuan University, Chengdu 610064, China.

<sup>b</sup> National Key Laboratory for Shock Wave and Detonation Physics Research, Institute of Fluid Physics, China Academy of Engineering Physics, Mianyang 621900, China.

\* Corresponding author Q.-F. Chen: E-mail: chenqf01@gmail.com

‡ Corresponding author X.-R. Chen: E-mail: xrchen@scu.edu.cn

66 low  $1800\text{ cm}^{-1}$ . The calculated Ama2 IR spectra show that intensi-  
67 ties of low-frequency IR modes are very weak and the low-frequency  
68 IR modes are sparse. Here we just compared the calculated low-  
69 frequency Raman frequencies of Ama2 with experiment data. In Fig-  
70 ure S5, the pressure dependence of frequencies of low-frequency Ra-  
71 man peaks of Ama2 and Pc can qualitatively coincide with the ex-  
72 perimental  $L_1$ ,  $L_2$ ,  $L_3$  modes. Particularly, the low-frequency Raman  
73 peak of Ama2 is in better agreement with experiment  $L_2$  compared  
74 with that of Pc. In addition, the low-frequency Raman peaks of Ama2  
75 also captured the phenomenon where experimental  $L_3$  splits into two  
76 modes.

## 77 Notes and references

- 78 1 I. B. Magdău and G. J. Ackland, *Phys. Rev. B*, 2013, **87**, 174110.
- 79 2 I. B. Magdău and G. J. Ackland, *J. Phys.: Conf. Ser.*, 2014, **500**,  
80 032012.
- 81 3 G. J. Ackland and I. B. Magdău, *High Press. Res.*, 2014, **34**, 198–  
82 204.
- 83 4 R. C. Clay, J. McMinis, J. M. McMahon, C. Pierleoni, D. M. Ceperley  
84 and M. A. Morales, *Phys. Rev. B*, 2014, **89**, 184106.
- 85 5 P. Loubeyre, F. Occelli and P. Dumas, *Phys. Rev. B*, 2013, **87**,  
86 134101.
- 87 6 B. Monserrat, N. D. Drummond, P. Dalladay-Simpson, R. T. Howie,  
88 P. López Ríos, E. Gregoryanz, C. J. Pickard and R. J. Needs, *Phys.*  
89 *Rev. Lett.*, 2018, **120**, 255701.
- 90 7 R. T. Howie, C. L. Guillaume, T. Scheler, A. F. Goncharov and  
91 E. Gregoryanz, *Phys. Rev. Lett.*, 2012, **108**, 125501.

**Table S1** The convergence of vibrational energy ( $E_{ZP}$ ) on the size of the supercell. The test was conducted at 200 GPa.

| Primitive cell (No. Atoms) | Supercell (No. Atoms) | $E_{ZP}$ (meV/proton) |
|----------------------------|-----------------------|-----------------------|
| C2c-24 (24)                | 2×2×1 (96)            | 308.63                |
| C2c-24 (24)                | 3×2×1 (144)           | 308.64                |
| Ama2 (24)                  | 2×2×1 (96)            | 307.15                |
| Ama2 (24)                  | 3×2×1 (144)           | 307.09                |
| Pc-48 (48)                 | 2×1×1 (96)            | 309.77                |
| Pc-48 (48)                 | 2×1×2 (192)           | 309.79                |
| Pbcn-48 (48)               | 2×1×1 (96)            | 309.17                |
| Pbcn-48 (48)               | 2×1×2 (192)           | 309.26                |
| Cmca-12 (12)               | 2×2×2 (96)            | 311.78                |
| Cmca-12 (12)               | 3×2×2 (144)           | 312.00                |
| Cmca-12 (12)               | 3×3×3 (324)           | 312.02                |
| Cmca-4 (4)                 | 3×3×2 (72)            | 303.16                |
| Cmca-4 (4)                 | 4×4×2 (128)           | 303.20                |
| Cmca-4 (4)                 | 4×4×3 (192)           | 303.28                |

**Table S2** Structural information of new founded Ama2 phase calculated by using the vdW-DF2.

| Space group | Pressure (GPa) | Lattice parameters (Å, °)                                                       | Atomic coordinates (fractional) |
|-------------|----------------|---------------------------------------------------------------------------------|---------------------------------|
| Ama2        | 300            | $a = 5.1670$ $b = 4.9990$<br>$c = 2.8788$<br>$\alpha = \beta = \gamma = 90.000$ | H1 0.9987 0.2475 0.3427         |
| 24          |                |                                                                                 | H2 0.0223 0.3732 -0.0520        |
|             |                |                                                                                 | H3 1.0000 0.5000 -0.4320        |
|             |                |                                                                                 | H4 1.0000 0.0000 0.8318         |
|             |                |                                                                                 | H5 0.2500 0.2011 0.0717         |
|             |                |                                                                                 | H6 0.2500 0.4803 0.0368         |
|             |                |                                                                                 | H7 0.2500 0.3333 0.4021         |
|             |                |                                                                                 | H8 0.2500 0.0735 0.1627         |
|             |                |                                                                                 | H9 0.7500 0.1788 0.1408         |
|             |                |                                                                                 | H10 0.7500 0.4063 0.1789        |

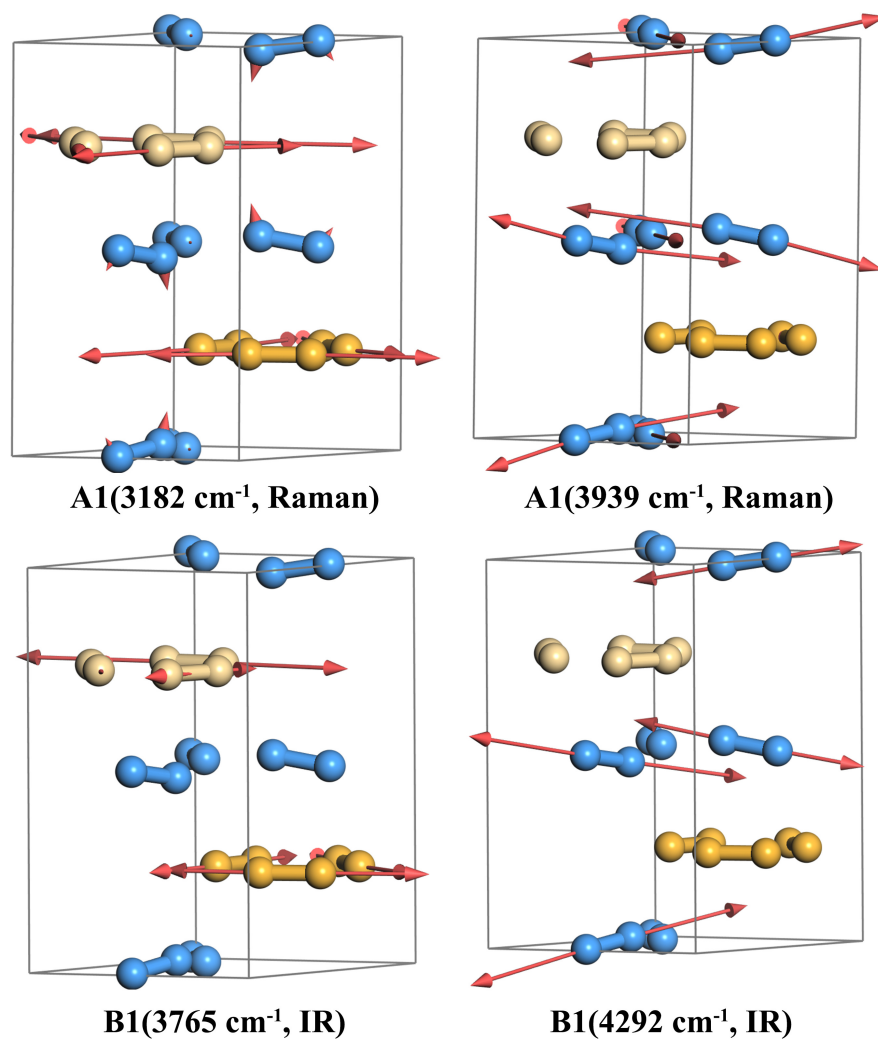

**Figure S1.** The four eigenvectors of Ama2 structure at 300GPa. The red arrows represent the vibrational direction of hydrogen molecule and the lengths of arrows represent the vibrational intensities.

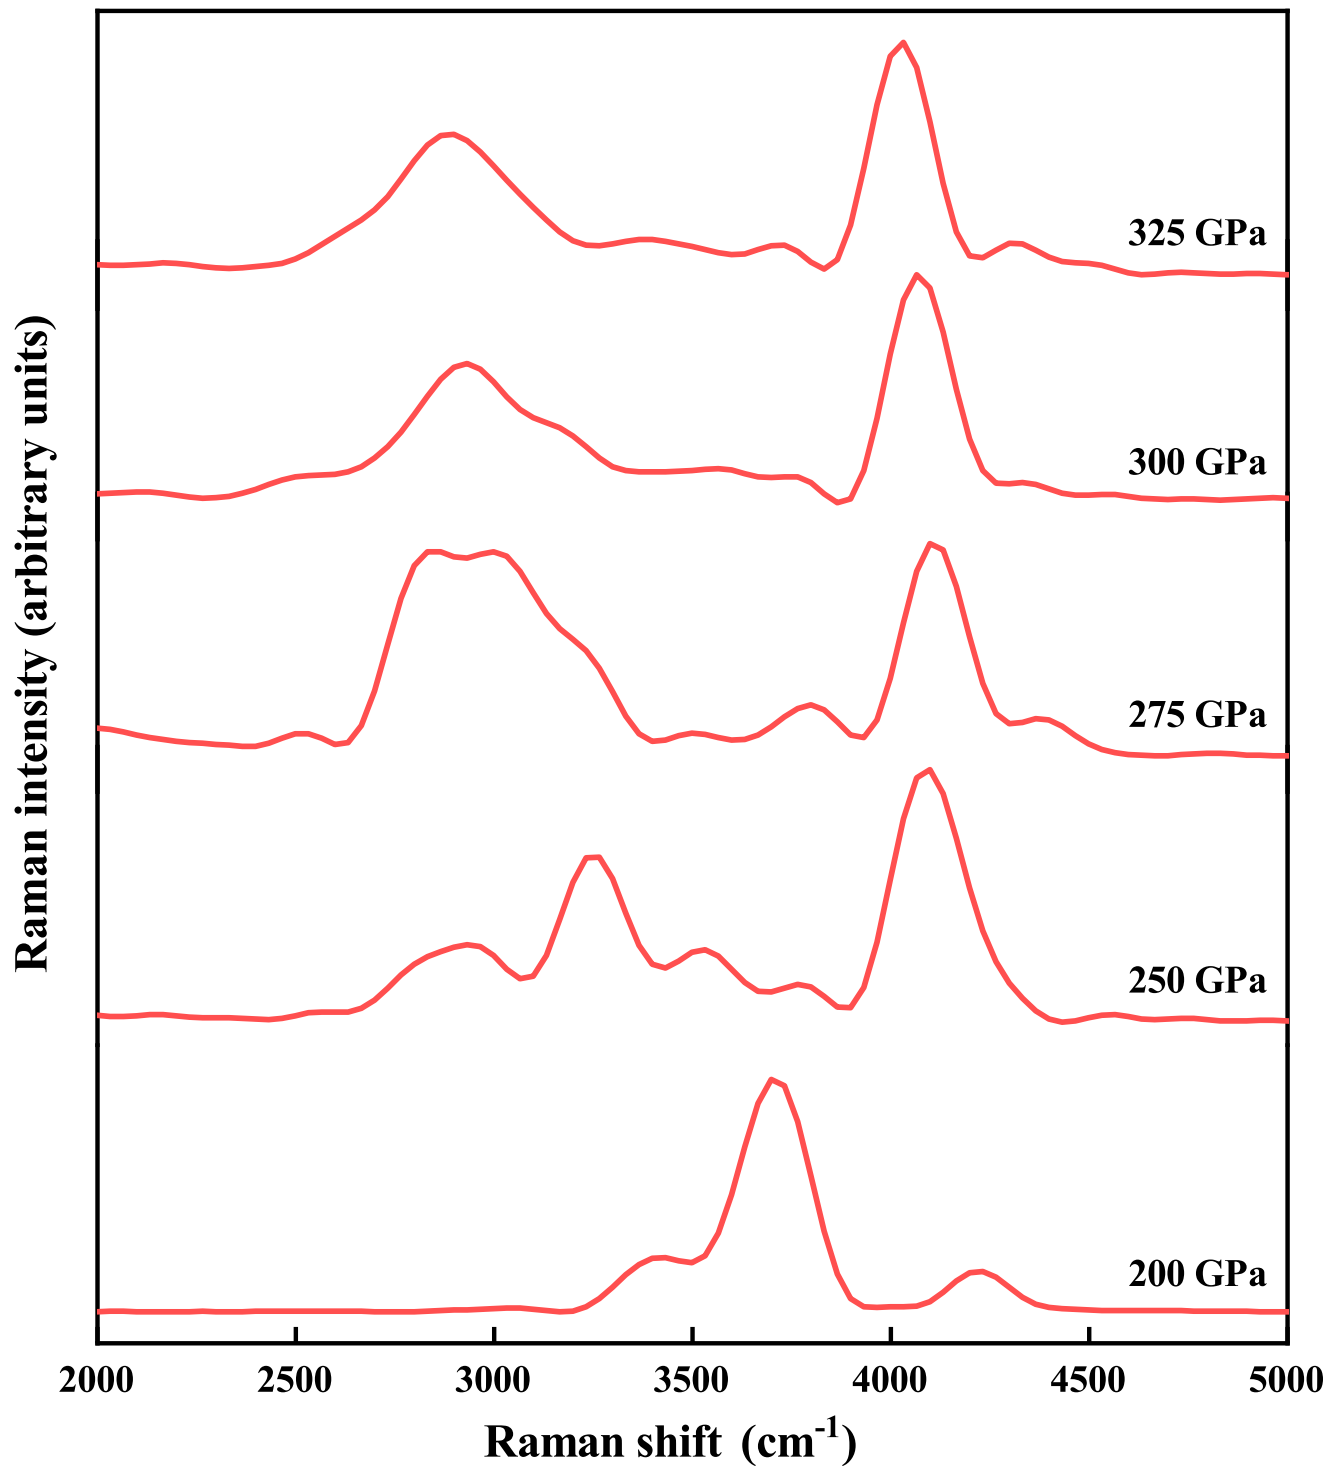

**Figure S2.** Calculated Raman peaks of Ama2 from FPMD at 220 K for a series of pressure points between 200 GPa and 325 GPa.

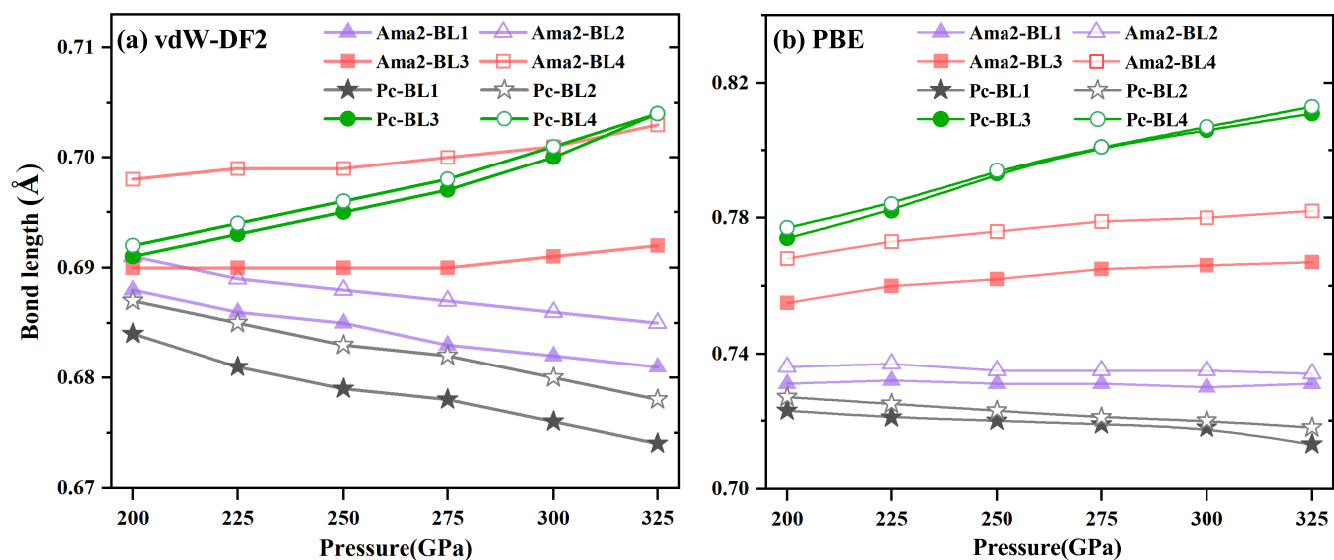

**Figure S3.** Pressure dependence of the bond lengths of Ama2 and Pc calculated by using the vdW-DF2 and PBE, respectively. Since Ama2 and Pc both have the two types of layer, we focused on the shorter and longer bond length in the strongly bonded and weakly bonded molecular layers, which are denoted as BL1, BL2 (for the strongly bonded molecular layer) and BL3, BL4 (for the weakly bonded molecular layer) respectively.

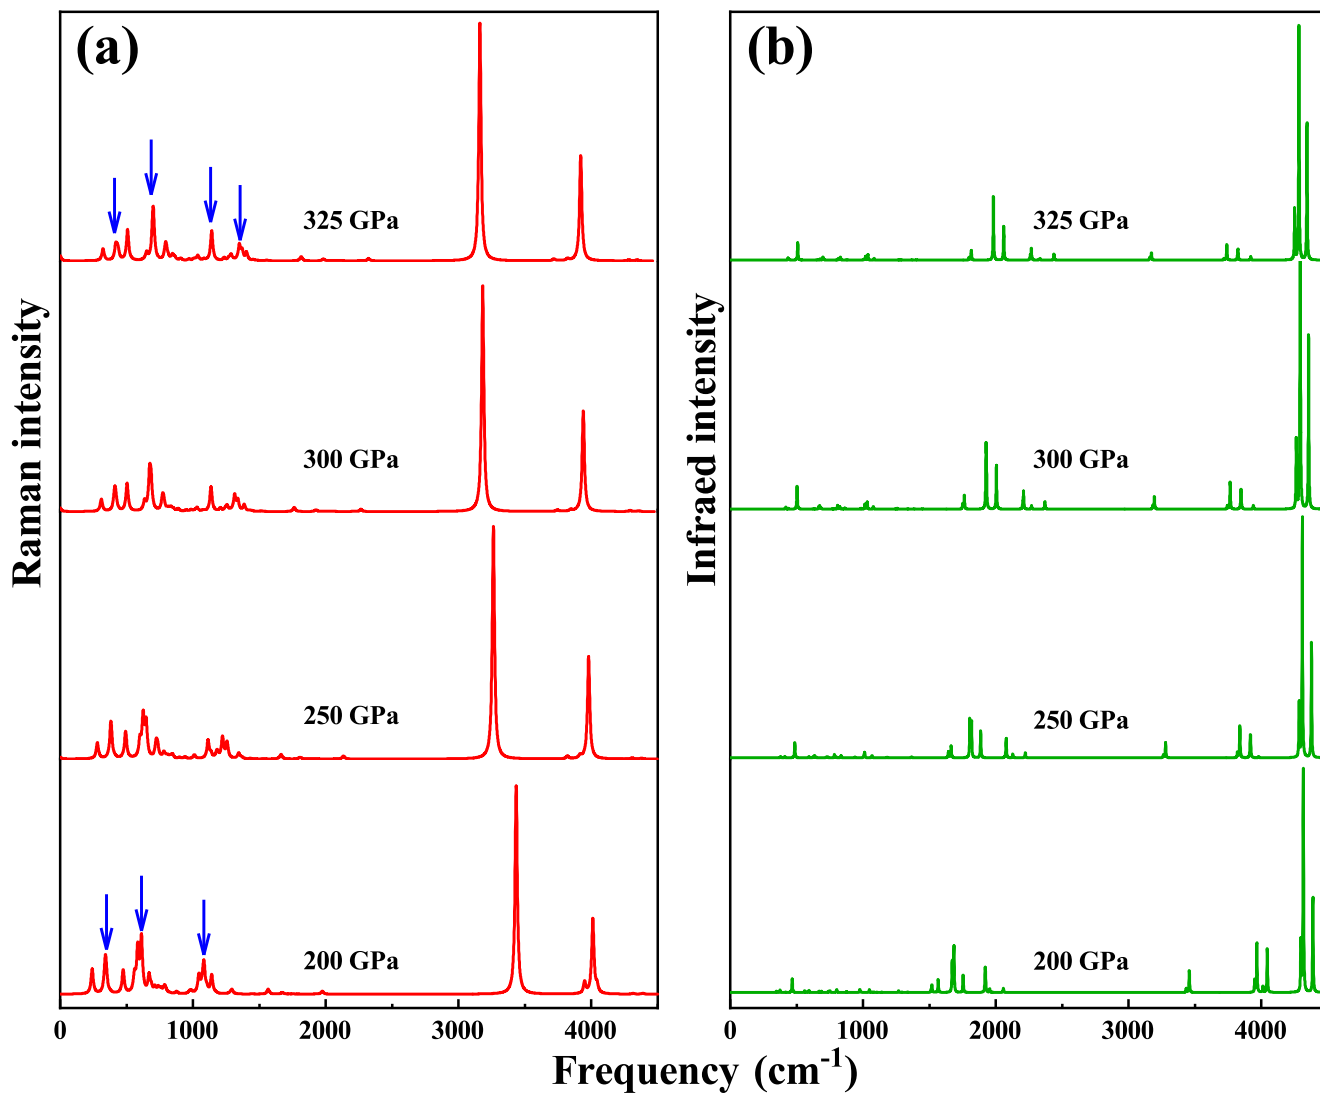

**Figure S4.** Raman (a) and infrared (b) spectra of Ama2 structure calculated LD at 200, 250, 300 and 325 GPa. Noting that only the relative intensities at the same pressure are meaning. Blue arrows represent intense Raman peaks which the low-frequency Raman frequencies are taken from.

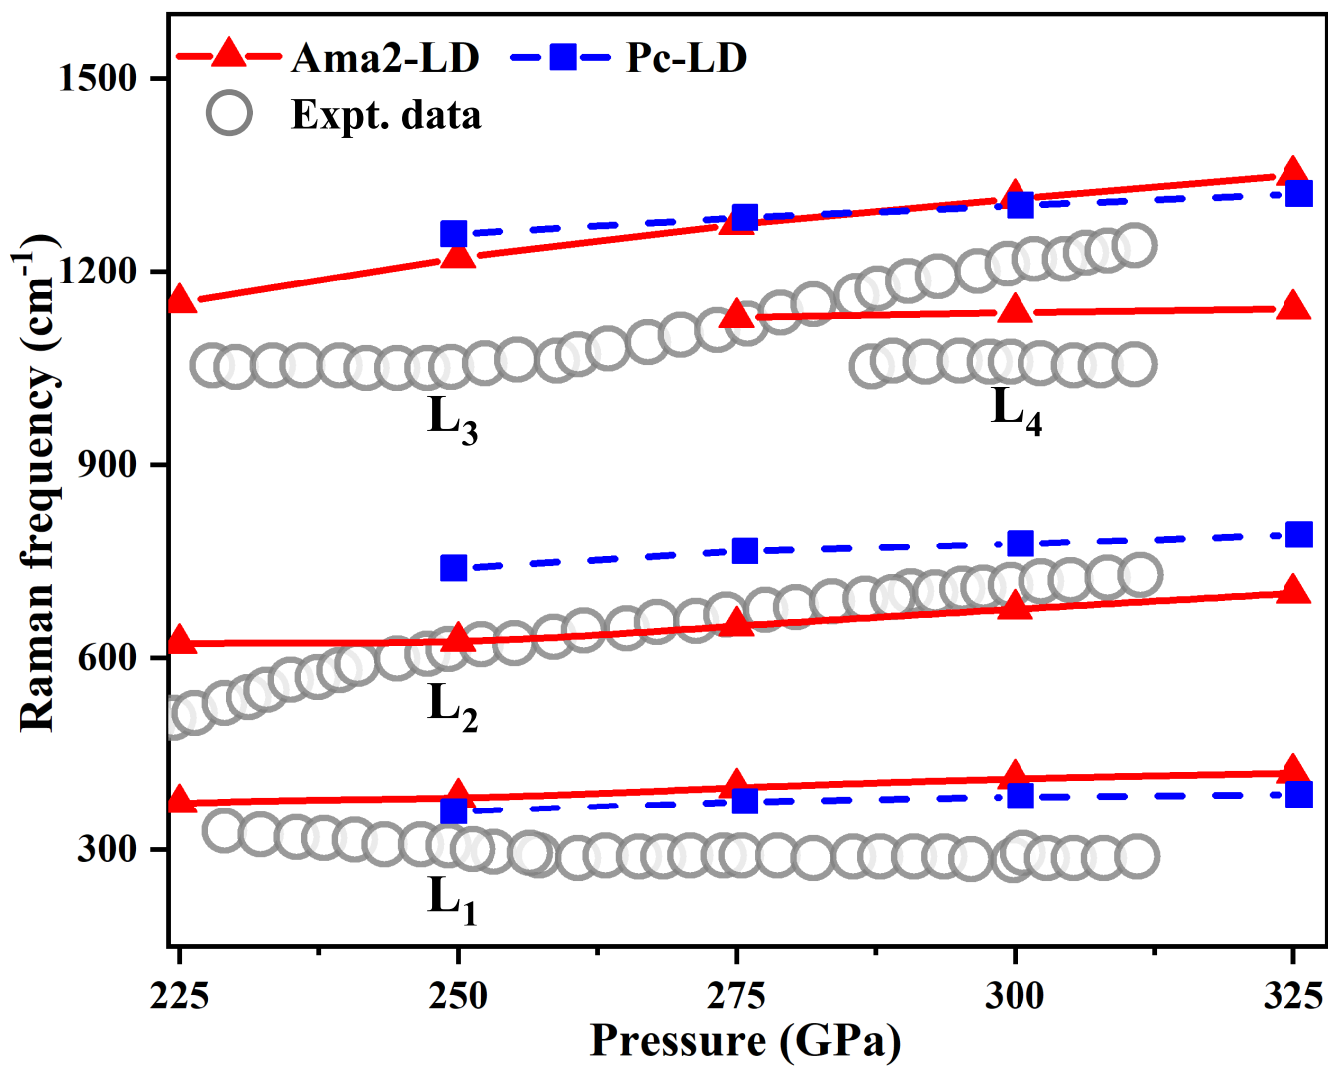

**Figure S5.** Pressure dependence of low-frequency Raman frequency of solid hydrogen. LD calculations were performed at 0 K for Ama2 (red triangle) and Pc LD data (blue square) are taken from<sup>6</sup> Monserrat *et al.*. Experimental data are taken from Howie *et al.*<sup>7</sup>
